# Supplementary figures and images for: Tetrabutylammonium tetrafluoroborate electrolyte as poly(vinyl chloride-co-vinyl acetate-co-2-hydroxypropyl acrylate) plasticizer: Thermal degradation and optical characteristics
Source: Research Square preprint supplement (doi:10.21203/rs.3.rs-1416243/v1), 2022-03-07

**Graphical abstract**

| 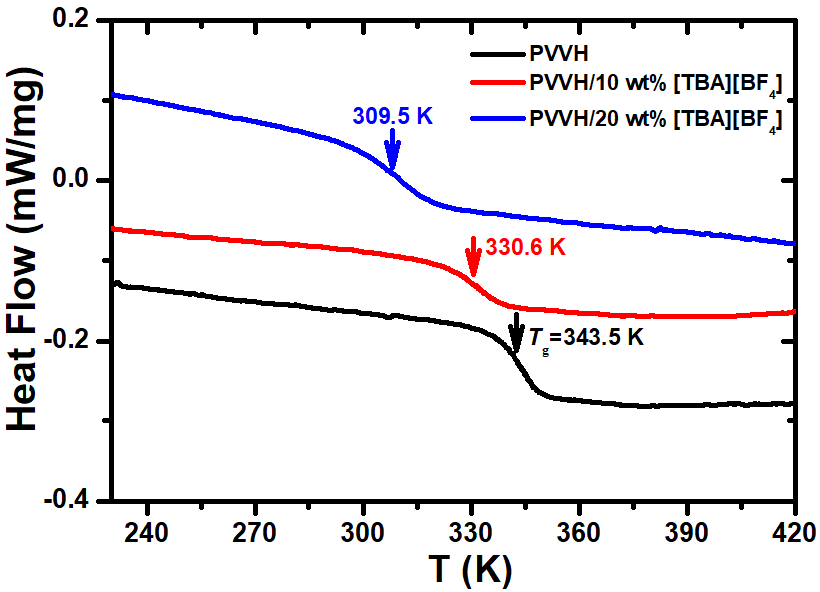 | 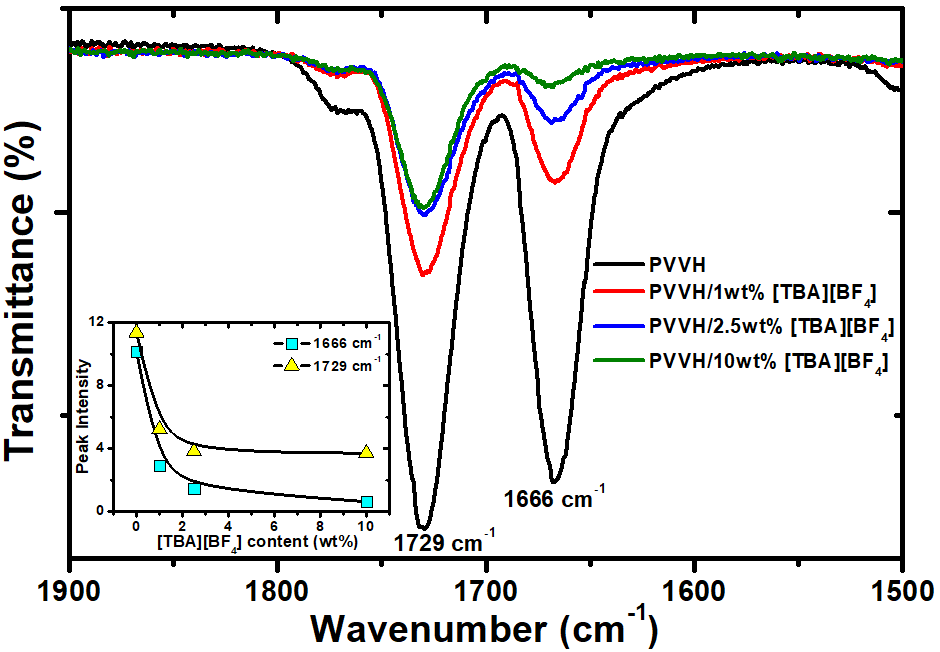 |
| --- | --- |

Supplement: Supplementary file 1 [file 050d725f274b6848eb39beef.docx]
